# Supplementary material for: A Novel Small-Molecule Inhibitor of Endosomal TLRs Reduces Inflammation and Alleviates Autoimmune Disease Symptoms in Murine Models
Source: PubMed Central journal article supplement (PMC7407930; doi:10.3390/cells9071648), 2020-07-09
Supplement: cells-09-01648-s001.pdf [file cells-09-01648-s001.pdf]

## Supplementary Materials

### **A novel small-molecule inhibitor of endosomal TLRs reduces inflammation and alleviates autoimmune disease symptoms in murine models**

Mahesh Chandra Patra<sup>1†</sup>, Asma Achek<sup>1†</sup>, Gi-Young Kim<sup>1†</sup>, Suresh Panneerselvam<sup>1</sup>, Hyeon-Jun Shin<sup>1</sup>, Wook-Yong Back<sup>2</sup>, Wang Hee Lee<sup>1</sup>, June Sung<sup>1</sup>, Uisuk Jeong<sup>1</sup>, Eun-Young Cho<sup>1</sup>, Wook Kim<sup>1</sup>, Eunha Kim<sup>1</sup>, Chang-Hee Suh<sup>2</sup> and Sangdun Choi<sup>1\*</sup>

<sup>1</sup>Department of Molecular Science and Technology, Ajou University, Suwon, 16499, Korea

<sup>2</sup>Department of Rheumatology, Ajou University School of Medicine, Suwon, 16499, Korea

\*Correspondence: sangdunchoi@ajou.ac.kr

†These authors have contributed equally to this work.

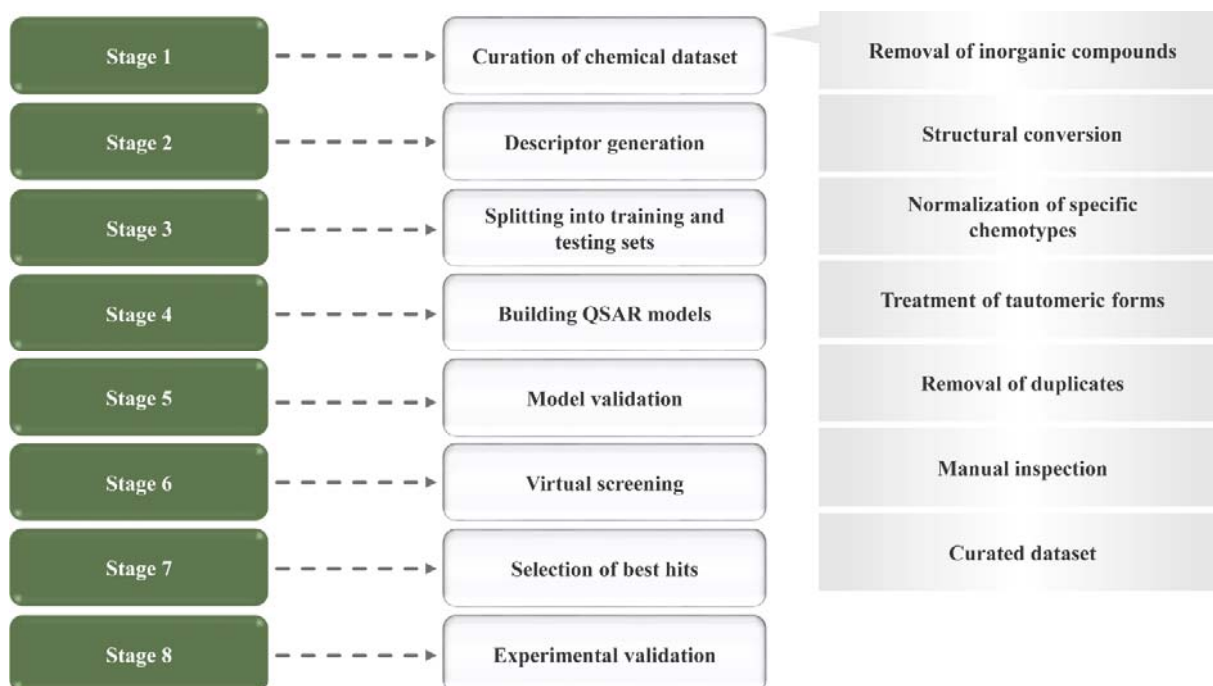

**Figure S1. The overall workflow of the Quantitative Structure-Activity Relationship modeling.** The curation of a chemical dataset (Stage 1) was further subdivided into several independent stages.

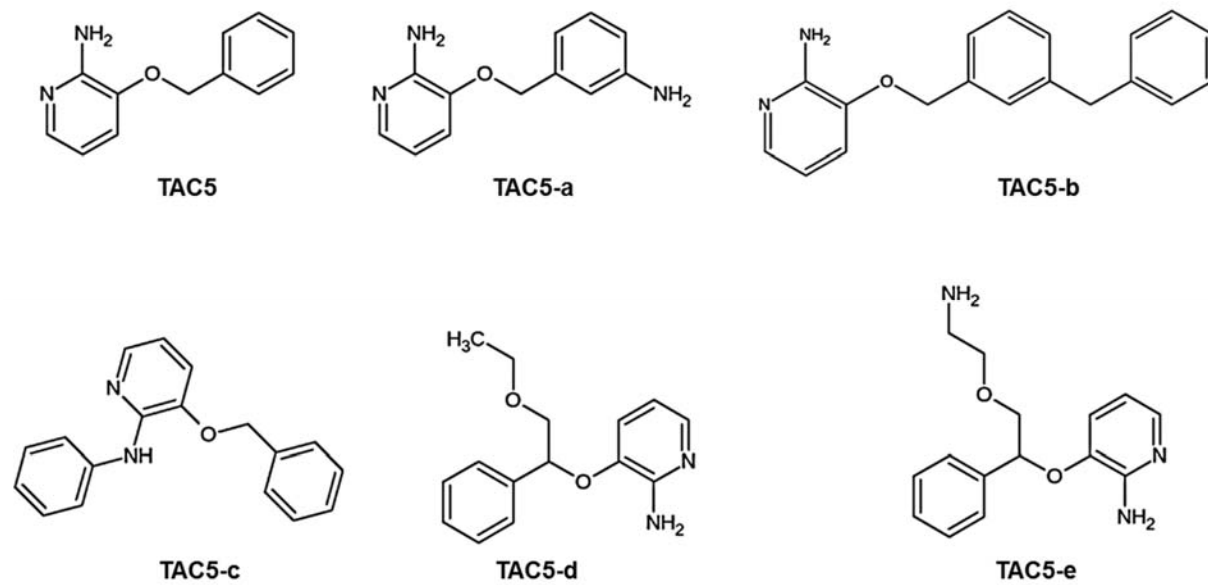

**Figure S2. The chemical structures of TAC5 derivatives.**

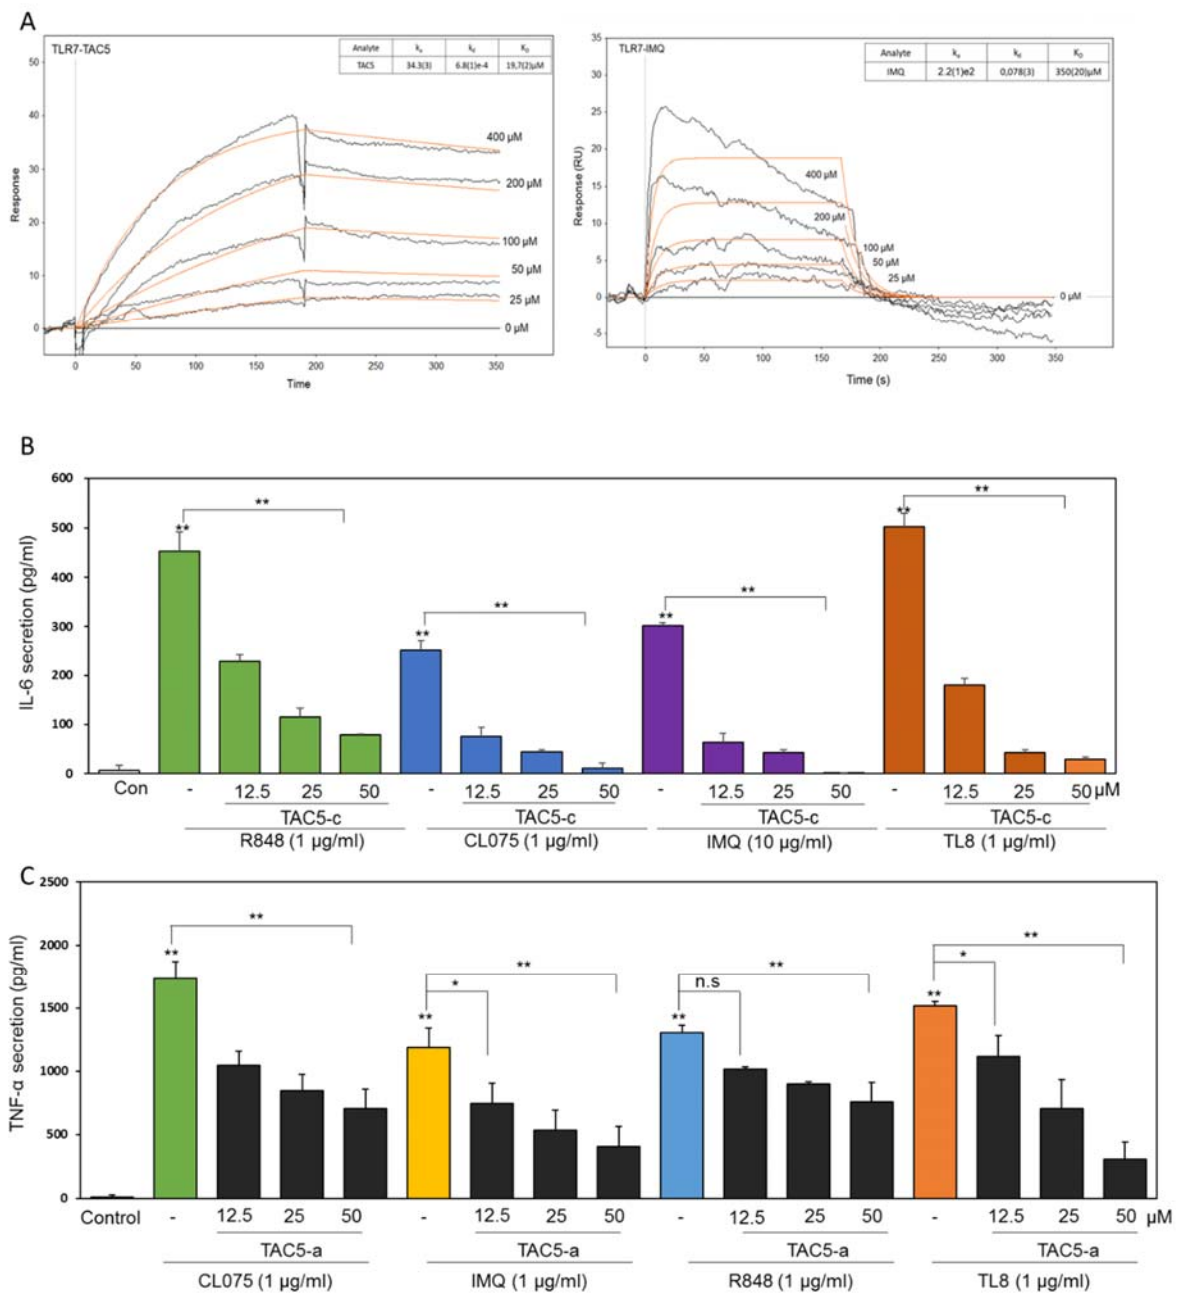

**Figure S3. The binding kinetics of TAC5 and inhibitory effects of TAC5-a and TAC5-c.** (A) SPR sensorgram illustrating the binding of TAC5 and IMQ to TLR7. (B) The inhibitory effects of TAC5-c on IL-6 secretion in RAW264.7 cells. (C) The inhibitory effects of TAC5-a on TNF- $\alpha$  secretion. The evaluation of the TAC5-a effect on the secretion of TNF- $\alpha$  from RAW264.7 cells after stimulating TLR7/8 with R848 or CL075, TLR7 with imiquimod, and TLR8 with TL8-506 ligands.

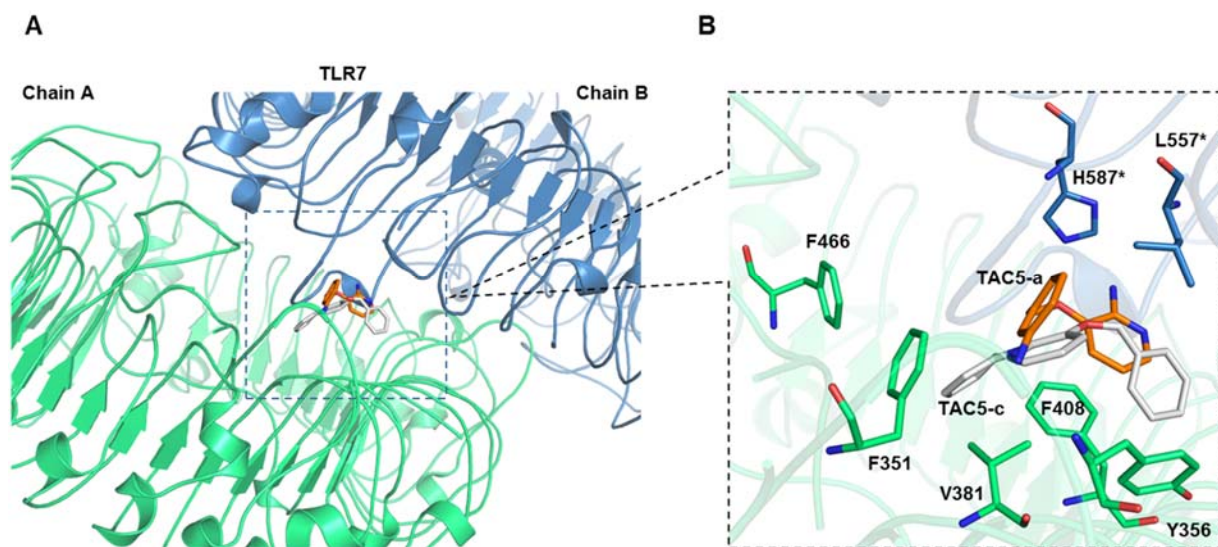

**Figure S4. Structural superimposition of TAC5-a and TAC5-c in the binding site of the TLR7 crystal structure.** (A) Overview of representative superimposed ligands in the ligand-binding site of the TLR7 extracellular domain. (B) A magnified view of the detailed intermolecular interaction of both TAC5-a and TAC5-c with the residues of TLR7.

**Table S1. List of chemical structures considered for QSAR model construction in the present study.**

| #  | SMILES Notation                                                     | Name     | Status | Reference | Concentration       |
|----|---------------------------------------------------------------------|----------|--------|-----------|---------------------|
| 1  | <chem>o1c2c(c(Nc3ncccc3)c1NC1CCCC1)c(c[nH+]e2C)CO</chem>            | 26_2012  | Active | [58]      | 6.93 $\mu\text{M}$  |
| 2  | <chem>o1c2c(c(Nc3ncnc3)c1NC1CCCC1)c(c[nH+]e2C)CO</chem>             | 27_2012  | Active | [58]      | 10.58 $\mu\text{M}$ |
| 3  | <chem>o1c2c(c(Nc3ncccc3)c1Nc1cccc1)c(c[nH+]e2C)CO</chem>            | 28_2012  | Active | [58]      | 4.91 $\mu\text{M}$  |
| 4  | <chem>o1c2c(c(Nc3ncnc3)c1Nc1cccc1)c(c[nH+]e2C)CO</chem>             | 29_2012  | Active | [58]      | 9.79 $\mu\text{M}$  |
| 5  | <chem>o1c2c(c(Nc3cccc3)c1Nc1cccc1)(cnc2C)CO</chem>                  | 36_2012  | Active | [58]      | 1.68 $\mu\text{M}$  |
| 6  | <chem>o1c2c(c(Nc3ncccc3)c1NCCCC)c(c[nH+]e2C)CO</chem>               | 37a_2012 | Active | [58]      | 9.38 $\mu\text{M}$  |
| 7  | <chem>o1c2c(c(Nc3ncccc3)c1NCCCC)c(c[nH+]e2C)CO</chem>               | 37b_2012 | Active | [58]      | 5.81 $\mu\text{M}$  |
| 8  | <chem>o1c2c(c(Nc3ncccc3)c1NC(CCC)C)c(c[nH+]e2C)CO</chem>            | 37d_2012 | Active | [58]      | 9.01 $\mu\text{M}$  |
| 9  | <chem>[Si](Nc1oc2c(c1Nc1ncccc1)c(c[nH+]e2C)CO)(C)(C)C</chem>        | 37f_2012 | Active | [58]      | 4.99 $\mu\text{M}$  |
| 10 | <chem>o1c2c(c(Nc3ncccc3)c1NCCC(OC(C)(C)C)=O)c(c[nH+]e2C)CO</chem>   | 37i_2012 | Active | [58]      | 7.64 $\mu\text{M}$  |
| 11 | <chem>o1c2c(c(Nc3ncccc3)c1NC(C)c1cccc1)c(c[nH+]e2C)CO</chem>        | 37m_2012 | Active | [58]      | 4.27 $\mu\text{M}$  |
| 12 | <chem>o1c2c(c(Nc3cccc3)c1NCCCC)c(c[nH+]e2C)CO</chem>                | 38a_2012 | Active | [58]      | 2.25 $\mu\text{M}$  |
| 13 | <chem>Fc1cc(Nc2c3c(oc2NCCCC)c([nH+]cc3CO)C)ccc1</chem>              | 38b_2012 | Active | [58]      | 0.37 $\mu\text{M}$  |
| 14 | <chem>o1c2c(c(Nc3cc([N+](=O)[O-])ccc3)c1NCCCC)c(c[nH+]e2C)CO</chem> | 38c_2012 | Active | [58]      | 0.85 $\mu\text{M}$  |
| 15 | <chem>[sH+]1c2c(nc1C)c(nc1c2cccc1)N</chem>                          | 8a_2013  | Active | [76]      | 2.06 $\mu\text{M}$  |
| 16 | <chem>[sH+]1c2c(nc1CC)c(nc1c2cccc1)N</chem>                         | 8b_2013  | Active | [76]      | 0.81 $\mu\text{M}$  |
| 17 | <chem>[sH+]1c2c(nc1CCC)c(nc1c2cccc1)N</chem>                        | 8c_2013  | Active | [76]      | 1.32 $\mu\text{M}$  |
| 18 | <chem>[sH+]1c2c(nc1CCCC)c(nc1c2cccc1)N</chem>                       | 8d_2013  | Active | [76]      | 0.41 $\mu\text{M}$  |
| 19 | <chem>[sH+]1c2c(nc1CCCC)c(nc1c2cccc1)N</chem>                       | 8e_2013  | Active | [76]      | 1.94 $\mu\text{M}$  |
| 20 | <chem>[sH+]1c2c(nc1C(C)C)c(nc1c2cccc1)N</chem>                      | 8i_2013  | Active | [76]      | 10.85 $\mu\text{M}$ |
| 21 | <chem>[sH+]1c2c(nc1CC(C)C)c(nc1c2cccc1)N</chem>                     | 8j_2013  | Active | [76]      | 1.55 $\mu\text{M}$  |
| 22 | <chem>[sH+]1c2c(nc1C(CC)C)c(nc1c2cccc1)N</chem>                     | 8n_2013  | Active | [76]      | 2.77 $\mu\text{M}$  |
| 23 | <chem>[sH+]1c2c(nc1CC(CC)C)c(nc1c2cccc1)N</chem>                    | 8o_2013  | Active | [76]      | 2.51 $\mu\text{M}$  |
| 24 | <chem>[sH+]1c2c(nc1CCC(F)(F)F)c(nc1c2cccc1)N</chem>                 | 8p_2013  | Active | [76]      | 1.61 $\mu\text{M}$  |

|    |                                                                     |                 |        |      |              |
|----|---------------------------------------------------------------------|-----------------|--------|------|--------------|
| 25 | <chem>[sH+]1c2c(nc1CCCC(F)(F)F)c(nc1c2cccc1)N</chem>                | 8q_2013         | Active | [76] | 6.29 $\mu$ M |
| 26 | <chem>[sH+]1c2c(nc1CCC)c(nc1cc(N)ccc12)N</chem>                     | 10_2013         | Active | [76] | 3.88 $\mu$ M |
| 27 | <chem>[sH+]1c2c(nc1CCC)c(nc1cc([N-][N+]#N)ccc12)N</chem>            | 11_2013         | Active | [76] | 2.06 $\mu$ M |
| 28 | <chem>[sH+]1c2c(nc1CCC)c(nc1c2cc(-n2nnc([Si](C)(C)C)c2)cc1)N</chem> | 12f_2013        | Active | [76] | 9.84 $\mu$ M |
| 29 | <chem>[sH+]1c2c(nc1CCC)c(nc1c2cccc1)NC(=O)C</chem>                  | 15e_2013        | Active | [76] | 0.88 $\mu$ M |
| 30 | <chem>[sH+]1c2c(nc1CCC)c(nc1c2cccc1)NC(=O)CCC</chem>                | 15f_2013        | Active | [76] | 1.14 $\mu$ M |
| 31 | <chem>[sH+]1c2c(nc1CCC)c(nc1c2cccc1)NC(=O)C[N-][N+]#N</chem>        | 15j_2013        | Active | [76] | 1.2 $\mu$ M  |
| 32 | <chem>[sH+]1c2c(nc1CCC)c(nc1c2cccc1)NC(=O)CC[N-][N+]#N</chem>       | 15k_2013        | Active | [76] | 2.23 $\mu$ M |
| 33 | <chem>[sH+]1c2c(nc1CCC)c(nc1c2cccc1)NC(=O)CCC#C</chem>              | 15l_2013        | Active | [76] | 1.2 $\mu$ M  |
| 34 | <chem>[sH+]1c2c(nc1CCC)c(nc1c2cccc1)NS(=O)(=O)C</chem>              | 15r_2013        | Active | [76] | 10.6 $\mu$ M |
| 35 | <chem>[sH+]1c2c(nc1CCCC)c(nc1c2cccc1)NC=O</chem>                    | 18a_2013        | Active | [76] | 2.31 $\mu$ M |
| 36 | <chem>[sH+]1c2c(nc1CCCC)c(nc1c2cccc1)NC(=O)CCC</chem>               | 18c_2013        | Active | [76] | 0.42 $\mu$ M |
| 37 | <chem>O(Cc1nc2c(n1CC(O)(C)C)c1c(nc2N)cccc1)CC</chem>                | R848_2015       | Active | [77] | 66.6 ng/ml   |
| 38 | <chem>OC(Cn1c2c(nc1CCCC)c(nc1c2cccc1)N)(C)C</chem>                  | Hybrid-2_2015   | Active | [77] | 2.5 ng/ml    |
| 39 | <chem>n1c2c(n(Cc3ccc(cc3)CN)c1CCCC)c1c(nc2N)cccc1</chem>            | para-amine_2015 | Active | [77] | 4.02 ng/ml   |
| 40 | <chem>[NH3+]Cc1cc(ccc1)Cn1c2c(nc1CCCC)c(nc1c2cccc1)N</chem>         | Meta-amine_2015 | Active | [77] | 29.4 ng/ml   |
| 41 | <chem>n1c(en(CCCCC)c1N)-c1cccc1</chem>                              | 17a_2016        | Active | [78] | 2.48 $\mu$ M |
| 42 | <chem>n1c(en(CCCCC)c1N)-c1cccc1C</chem>                             | 17b_2016        | Active | [78] | 2.5 $\mu$ M  |
| 43 | <chem>n1c(en(CCCCC)c1N)-c1cccc1CC</chem>                            | 17c_2016        | Active | [78] | 2.5 $\mu$ M  |
| 44 | <chem>n1c(en(CCCCC)c1N)-c1ccc(ccc1)C</chem>                         | 17d_2016        | Active | [78] | 2 $\mu$ M    |
| 45 | <chem>n1c(en(CCCCC)c1N)-c1ccc(cc1)C</chem>                          | 17e_2016        | Active | [78] | 2.5 $\mu$ M  |
| 46 | <chem>n1c(en(CCCCC)c1N)-c1cccc(C)c1C</chem>                         | 17f_2016        | Active | [78] | 1.5 $\mu$ M  |
| 47 | <chem>n1c(en(CCCCC)c1N)-c1ccc(cc1C)C</chem>                         | 17g_16          | Active | [78] | 1.5 $\mu$ M  |
| 48 | <chem>n1c(en(CCCCC)c1N)-c1ccc(ccc1C)C</chem>                        | 17h_2016        | Active | [78] | 1.5 $\mu$ M  |
| 49 | <chem>n1c(en(CCCCC)c1N)-c1c(cccc1C)C</chem>                         | 17i_2016        | Active | [78] | 2.5 $\mu$ M  |
| 50 | <chem>n1c(en(CCCCC)c1N)Cc1cccc1</chem>                              | 18a_1_2016      | Active | [78] | 2.7 $\mu$ M  |
| 51 | <chem>n1c(en(CCCCC)c1N)CCc1cccc1</chem>                             | 18b_1_2016      | Active | [78] | 1.8 $\mu$ M  |

|    |                                                    |            |        |      |              |
|----|----------------------------------------------------|------------|--------|------|--------------|
| 52 | <chem>n1c(en(CCCCC)c1N)-c1c2c(ccc1)cccc2</chem>    | 18c_1_2016 | Active | [78] | 1.5 $\mu$ M  |
| 53 | <chem>OCc1ccccc1-c1nc(n(c1)CCCC)N</chem>           | 19d_2016   | Active | [78] | 8.05 $\mu$ M |
| 54 | <chem>n1c(en(CCCCC)c1N)-c1ccc(N)cc1</chem>         | 19e_2016   | Active | [78] | 8 $\mu$ M    |
| 55 | <chem>O(C(=O)c1ccc(cc1)-c1nc(n(c1)CCCC)N)C</chem>  | 19g_2016   | Active | [78] | 4.04 $\mu$ M |
| 56 | <chem>O(C)c1ccccc1-c1nc(n(c1)CCCC)N</chem>         | 20a_2016   | Active | [78] | 1.6 $\mu$ M  |
| 57 | <chem>O(C)c1cc(ccc1)-c1nc(n(c1)CCCC)N</chem>       | 20b_2016   | Active | [78] | 2.2 $\mu$ M  |
| 58 | <chem>O(C)c1ccc(cc1)-c1nc(n(c1)CCCC)N</chem>       | 20c_2016   | Active | [78] | 2.94 $\mu$ M |
| 59 | <chem>O(C)c1cc(C)c(cc1)-c1nc(n(c1)CCCC)N</chem>    | 20d_2016   | Active | [78] | 1.5 $\mu$ M  |
| 60 | <chem>O(C)c1c(cccc1C)-c1nc(n(c1)CCCC)N</chem>      | 20e_2016   | Active | [78] | 1.5 $\mu$ M  |
| 61 | <chem>O(C)c1c(cccc1OC)-c1nc(n(c1)CCCC)N</chem>     | 20f_2016   | Active | [78] | 1.5 $\mu$ M  |
| 62 | <chem>O(C)c1c(OC)cc(cc1OC)-c1nc(n(c1)CCCC)N</chem> | 20g_2016   | Active | [78] | 3.08 $\mu$ M |
| 63 | <chem>Clc1ccccc1-c1nc(n(c1)CCCC)N</chem>           | 21a_2016   | Active | [78] | 1.36 $\mu$ M |
| 64 | <chem>Clc1cc(ccc1)-c1nc(n(c1)CCCC)N</chem>         | 21b_2016   | Active | [78] | 1.93 $\mu$ M |
| 65 | <chem>Clc1ccc(cc1)-c1nc(n(c1)CCCC)N</chem>         | 21c_2016   | Active | [78] | 6.83 $\mu$ M |
| 66 | <chem>Fc1ccccc1-c1nc(n(c1)CCCC)N</chem>            | 21d_2016   | Active | [78] | 2.35 $\mu$ M |
| 67 | <chem>Fc1cc(ccc1)-c1nc(n(c1)CCCC)N</chem>          | 21e_2016   | Active | [78] | 2.57 $\mu$ M |
| 68 | <chem>Fc1ccc(cc1)-c1nc(n(c1)CCCC)N</chem>          | 21f_2016   | Active | [78] | 1.96 $\mu$ M |
| 69 | <chem>Fc1cc(C)c(cc1)-c1nc(n(c1)CCCC)N</chem>       | 21g_2016   | Active | [78] | 2.01 $\mu$ M |
| 70 | <chem>FC(F)(F)c1ccccc1-c1nc(n(c1)CCCC)N</chem>     | 21h_2016   | Active | [78] | 1.64 $\mu$ M |
| 71 | <chem>FC(F)(F)c1cc(ccc1)-c1nc(n(c1)CCCC)N</chem>   | 21i_2016   | Active | [78] | 1.98 $\mu$ M |
| 72 | <chem>FC(F)(F)c1ccc(cc1)-c1nc(n(c1)CCCC)N</chem>   | 21j_2016   | Active | [78] | 2.48 $\mu$ M |
| 73 | <chem>Ic1c(nc(nc1NCCCC)N)C</chem>                  | 4b_2016_2  | Active | [79] | 1.64 $\mu$ M |
| 74 | <chem>Ic1c(nc(nc1NCCCC)N)C</chem>                  | 4c_2016_2  | Active | [79] | 3.7 $\mu$ M  |
| 75 | <chem>Brc1c(nc(nc1NCCCC)N)C</chem>                 | 6b         | Active | [79] | 8.5 $\mu$ M  |
| 76 | <chem>n1c(C)c(CCCN)c(nc1N)NCCCC</chem>             | 27a        | Active | [79] | 2.31 $\mu$ M |
| 77 | <chem>n1c(C)c(CCCCN)c(nc1N)NCCCC</chem>            | 27b        | Active | [79] | 0.3 $\mu$ M  |
| 78 | <chem>n1c(C)c(CCCCCN)c(nc1N)NCCCC</chem>           | 27c        | Active | [79] | 0.3 $\mu$ M  |



|     |                                                              |            |        |      |              |
|-----|--------------------------------------------------------------|------------|--------|------|--------------|
| 79  | <chem>o1c2c(c(Nc3[nH+]cccc3)c1Nc1cccc1)c(c[nH+]c2C)CO</chem> | 28         | Active | [79] | 6.7 $\mu$ M  |
| 80  | <chem>n1c(-e2cccc2)c(CCCCN)c(nc1N)NCCCC</chem>               | 32b        | Active | [79] | 2.7 $\mu$ M  |
| 81  | <chem>n1c(-e2cccc2)c(CCCCN)c(nc1N)NCCCC</chem>               | 32c        | Active | [79] | 2.35 $\mu$ M |
| 82  | <chem>n1c2c(ccc2)c(Cc2cc(cc2)CN)c(CCCCC)c1N</chem>           | 9a_2015    | Active | [80] | 150 nM       |
| 83  | <chem>[NH3+]Cc1ccc(cc1)Cc1c2c(nc(N)c1CCCC)cccc2</chem>       | 9b_2015    | Active | [80] | 120 nM       |
| 84  | <chem>[NH3+]CCCCc1c2c(nc(N)c1CCCC)cccc2</chem>               | 14a_2015   | Active | [80] | 190 nM       |
| 85  | <chem>n1c2c(ccc2)c(CCCCN)c(CCCCC)c1N</chem>                  | 14b_2015   | Active | [80] | 250 nM       |
| 86  | <chem>n1c2c(cc(CCCCC)c1N)c(cc2)Cc1cc(ccc1)CN</chem>          | 18a_2015   | Active | [80] | 49 nM        |
| 7   | <chem>n1c2c(cc(CCCCC)c1N)c(cc2)Cc1ccc(cc1)CN</chem>          | 18b_2015   | Active | [80] | 38 nM        |
| 88  | <chem>n1c2c(cc(CCCCC)c1N)c(cc2)Cc1cccc1CN</chem>             | 18c_2015   | Active | [80] | 1000 nM      |
| 89  | <chem>[NH3+]Cc1ccc(cc1)-c1c2cc(CCCCC)c(nc2ccc1)N</chem>      | 20b_2015   | Active | [80] | 699 nM       |
| 90  | <chem>n1c2c(cc(CCCCC)c1N)c(cc2)CCCN</chem>                   | 23_b_2015  | Active | [80] | 91 nM        |
| 91  | <chem>n1c2c(cc(CCCCC)c1N)c(cc2)CCCN</chem>                   | 34a_2_2015 | Active | [80] | 27 nM        |
| 92  | <chem>n1c2c(cc(CCCCC)c1N)c(cc2)CCCCCN</chem>                 | 34b_2_2015 | Active | [80] | 9 nM         |
| 93  | <chem>n1c2c(cc(CCCCC)c1N)c(cc2)CCCCCN</chem>                 | 34c_2_2015 | Active | [80] | 56 nM        |
| 94  | <chem>O=C(N)CCCc1c2cc(CCCCC)c(nc2ccc1)N</chem>               | 34d_2_2015 | Active | [80] | 2181 nM      |
| 95  | <chem>n1c2c(cc(CCCCC)c1N)c(cc2)CCCCNC(N)=N</chem>            | 34e_2_2015 | Active | [80] | 2862 nM      |
| 96  | <chem>n1c2c(cc(CCCCC)c1N)cc(cc2)CCCN</chem>                  | 35a_2_2015 | Active | [80] | 727 nM       |
| 97  | <chem>n1c2c(cc(CCCCC)c1N)cc(cc2)CCCCCN</chem>                | 35b_2_2015 | Active | [80] | 519 nM       |
| 98  | <chem>n1c2c(cc(CCCCC)c1N)cc(cc2)CCCCCN</chem>                | 35c_2_2015 | Active | [80] | 1016 nM      |
| 99  | <chem>n1c2cc(ccc2cc(CCCCC)c1N)CCCN</chem>                    | 36a_2_2015 | Active | [80] | 60 nM        |
| 100 | <chem>n1c2cc(ccc2cc(CCCCC)c1N)CCCCCN</chem>                  | 36b_2_2015 | Active | [80] | 50 nM        |
| 101 | <chem>n1c2cc(ccc2cc(CCCCC)c1N)CCCCCN</chem>                  | 36c_2_2015 | Active | [80] | 85 nM        |
| 102 | <chem>n1c2c(cc(CCCCC)c1N)c(cc(c2)CCCCCN)CCCCCN</chem>        | 43_2015    | Active | [80] | 621 nM       |
| 103 | <chem>n1c2c(n(CCCC)c1N)cccc2</chem>                          | 8a_3       | Active | [81] | 7.3 $\mu$ M  |
| 104 | <chem>n1c2c(n(CCCCC)c1N)cccc2</chem>                         | 8b_3       | Active | [81] | 3.23 $\mu$ M |
| 105 | <chem>n1c2c(n(CCCCC)c1N)cccc2</chem>                         | 8c_3       | Active | [81] | 3.95 $\mu$ M |

|     |                                                                               |          |          |      |               |
|-----|-------------------------------------------------------------------------------|----------|----------|------|---------------|
| 106 | <chem>n1c2c3c(ccc2n(CCCCC)c1N)cccc3</chem>                                    | 23_3_3   | Active   | [81] | 3.16 $\mu$ M  |
| 107 | <chem>n1c2c(n(CCCCC)c1N)cccc2C</chem>                                         | 31a_3    | Active   | [81] | 1.13 $\mu$ M  |
| 108 | <chem>n1c2cc(ccc2n(CCCCC)c1N)C</chem>                                         | 31b_3    | Active   | [81] | 4.57 $\mu$ M  |
| 109 | <chem>n1c2c(n(CCCCC)c1N)cc(cc2)C</chem>                                       | 31c_3    | Active   | [81] | 7.21 $\mu$ M  |
| 110 | <chem>n1c2c(n(CCCCC)c1N)c(ccc2)C</chem>                                       | 31d_3    | Active   | [81] | 6.61 $\mu$ M  |
| 111 | <chem>O(C)c1c2nc(n(c2ccc1)CCCCC)N</chem>                                      | 31e_3    | Active   | [81] | 3.74 $\mu$ M  |
| 112 | <chem>n1c2c(n(CCCCC)c1N)cccc2CC</chem>                                        | 31j_3    | Active   | [81] | 1.65 $\mu$ M  |
| 113 | <chem>n1c2c(n(CCCCC)c1N)cccc2N(C)C</chem>                                     | 31k_3    | Active   | [81] | 7.12 $\mu$ M  |
| 114 | <chem>Oc1c2nc(n(c2ccc1)CCCCC)N</chem>                                         | 36_3     | Active   | [81] | 5.01 $\mu$ M  |
| 115 | <chem>n1c2c(n(CCCCC)c1N)cccc2N</chem>                                         | 40_3     | Active   | [81] | 6.6 $\mu$ M   |
| 116 | <chem>O(CCCC)c1cc2c(nc1N)cccc2</chem>                                         | 6_4      | Active   | [82] | 2.18 $\mu$ M  |
| 117 | <chem>n1c2c(cc(NCCCC)c1N)cccc2</chem>                                         | 9_4      | Active   | [82] | 4.28 $\mu$ M  |
| 118 | <chem>S(CCCC)c1cc2c(nc1N)cccc2</chem>                                         | 12_4     | Active   | [82] | 4.16 $\mu$ M  |
| 119 | <chem>n1c2c(cc(CCCC)c1N)cccc2</chem>                                          | 14a_4    | Active   | [82] | 0.41 $\mu$ M  |
| 120 | <chem>n1c2c(cc(CCCCC)c1N)cccc2</chem>                                         | 14b_4    | Active   | [82] | 0.2 $\mu$ M   |
| 121 | <chem>n1c2c(cc(C=CCCC)c1N)cccc2</chem>                                        | 14d_4    | Active   | [82] | 2.67 $\mu$ M  |
| 122 | <chem>n1c2c(cc(CCCC=C)c1N)cccc2</chem>                                        | 14e_4    | Active   | [82] | 0.49 $\mu$ M  |
| 123 | <chem>O(CCC)c1cc2c(nc1N)cccc2</chem>                                          | 6c_4     | Active   | [82] | 5 $\mu$ M     |
| 124 | <chem>O(CCCCC)c1cc2c(nc1N)cccc2</chem>                                        | 6d_4     | Active   | [82] | 7 $\mu$ M     |
| 125 | <chem>O(CC(CC)C)c1cc2c(nc1N)cccc2</chem>                                      | 6i_4     | Active   | [82] | 10 $\mu$ M    |
| 126 | <chem>OCCn1c2c(nc1CCCCCCCC)c1c(nc2)cccc1</chem>                               | 6d_2011  | Active   | [56] | 4.81 $\mu$ M  |
| 127 | <chem>n1c2c3c(ncc2n(CC#C)c1CCCCCCCC)cccc3</chem>                              | 7d_2011  | Active   | [56] | 10.07 $\mu$ M |
| 128 | <chem>O(C)c1ccc(cc1)Cn1c2c(nc1-c1cccc1)c1c([n+](c2)Cc2ccc(OC)cc2)cccc1</chem> | 12_2011  | Active   | [56] | 4.55 $\mu$ M  |
| 129 | <chem>o1c2c(c(Nc3ncccc3)c1NC(C)(C)C)c(c[nH+])c2C)CO</chem>                    | 24_2012  | Inactive | [58] | N/A           |
| 130 | <chem>o1c2c(c(Nc3ncnc3)c1NC(C)(C)C)c(c[nH+])c2C)CO</chem>                     | 25_2012  | Inactive | [58] | N/A           |
| 131 | <chem>O(c1nccc(O)c1-c1[nH]c2[n+](cccc2)c1NC1CCCC1)c1cccc1</chem>              | 35_2012  | Inactive | [58] | N/A           |
| 132 | <chem>o1c2c(c(Nc3ncccc3)c1NC(C)C)c(c[nH+])c2C)CO</chem>                       | 37c_2012 | Inactive | [58] | N/A           |

|     |                                                                      |          |          |      |     |
|-----|----------------------------------------------------------------------|----------|----------|------|-----|
| 133 | <chem>o1c2c(c(Nc3ncnc3)c1NC(CC(C)(C)C)(C)C)c(c[nH+]c2C)CO</chem>     | 37e_2012 | Inactive | [58] | N/A |
| 134 | <chem>o1c2c(c(Nc3ncccc3)c1NCCN1CCOCC1)c(c[nH+]c2C)CO</chem>          | 37g_2012 | Inactive | [58] | N/A |
| 135 | <chem>o1c2c(c(Nc3ncccc3)c1NCC(OCC)=O)c(c[nH+]c2C)CO</chem>           | 37h_2012 | Inactive | [58] | N/A |
| 136 | <chem>P(OCC)(OCC)([O-]=[CH]Nc1oc2c(c1Nc1ncccc1)c(c[nH+]c2C)CO</chem> | 37j_2012 | Inactive | [58] | N/A |
| 137 | <chem>o1c2c(c(Nc3ncccc3)c1Nc1ccc(OC)cc1)c(c[nH+]c2C)CO</chem>        | 37k_2012 | Inactive | [58] | N/A |
| 138 | <chem>Clc1cccc(C)c1Nc1oc2c(c1Nc1ncccc1)c(c[nH+]c2C)CO</chem>         | 37l_2012 | Inactive | [58] | N/A |
| 139 | <chem>o1c2c(c(Nc3ncccc3)c1N)c(c[nH+]c2C)CO</chem>                    | 37n_2012 | Inactive | [58] | N/A |
| 140 | <chem>[sH+]1c2c(nc1CCCCC)c(nc1c2cccc1)N</chem>                       | 8f_2013  | Inactive | [76] | N/A |
| 141 | <chem>[sH+]1c2c(nc1CCCCC)c(nc1c2cccc1)N</chem>                       | 8g_2013  | Inactive | [76] | N/A |
| 142 | <chem>[sH+]1c2c(nc1CCCCC)c(nc1c2cccc1)N</chem>                       | 8h_2013  | Inactive | [76] | N/A |
| 143 | <chem>[sH+]1c2c(nc1CC(C)(C)C)c(nc1c2cccc1)N</chem>                   | 8k_2013  | Inactive | [76] | N/A |
| 144 | <chem>[sH+]1c2c(nc1CCC(C)C)c(nc1c2cccc1)N</chem>                     | 8l_2013  | Inactive | [76] | N/A |
| 145 | <chem>[sH+]1c2c(nc1CCC(C)(C)C)c(nc1c2cccc1)N</chem>                  | 8m_2013  | Inactive | [76] | N/A |
| 146 | <chem>[sH+]1c2c(nc1CCC)c(nc1cc([N+](=O)[O-])ccc12)N</chem>           | 9_2013   | Inactive | [76] | N/A |
| 147 | <chem>[sH+]1c2c(nc1CCC)c(nc1c2cc(-n2nnc(c2)C(O)(C)C)cc1)N</chem>     | 12a_2013 | Inactive | [76] | N/A |
| 148 | <chem>[sH+]1c2c(nc1CCC)c(nc1c2cc(-n2nnc(c2)CO)cc1)N</chem>           | 12b_2013 | Inactive | [76] | N/A |
| 149 | <chem>[sH+]1c2c(nc1CCC)c(nc1c2cc(-n2nnc(c2)-c2cccc2)cc1)N</chem>     | 12c_2013 | Inactive | [76] | N/A |
| 150 | <chem>[sH+]1c2c(nc1CCC)c(nc1c2cc(-n2nnc(c2)CCC)cc1)N</chem>          | 12d_2013 | Inactive | [76] | N/A |
| 151 | <chem>[sH+]1c2c(nc1CCC)c(nc1c2cc(-n2nnc(c2)CCCC)cc1)N</chem>         | 12e_2013 | Inactive | [76] | N/A |
| 152 | <chem>[sH+]1c2c(nc1CCC)c(nc1c2cc(-n2nnc2)cc1)N</chem>                | 12g_2013 | Inactive | [76] | N/A |
| 153 | <chem>[sH+]1c2c(nc1CCC)c(nc1c2cc(cc1)CCCC)N</chem>                   | 13a_2013 | Inactive | [76] | N/A |
| 154 | <chem>[sH+]1c2c(nc1CCC)c(nc1c2cc(cc1)C(=O)CCC)N</chem>               | 13b_2013 | Inactive | [76] | N/A |
| 155 | <chem>Brc1cc2c(nc(N)c3nc([sH+]c23)CCC)cc1</chem>                     | 14_2013  | Inactive | [76] | N/A |
| 156 | <chem>[sH+]1c2c(nc1CCC)c(nc1c2cccc1)NCCCC</chem>                     | 15a_2013 | Inactive | [76] | N/A |
| 157 | <chem>[sH+]1c2c(nc1CCC)c(nc1c2cccc1)NCCCCC</chem>                    | 15b_2013 | Inactive | [76] | N/A |
| 158 | <chem>[sH+]1c2c(nc1CCC)c(nc1c2cccc1)NCCCCCCCCCCCC</chem>             | 15c_2013 | Inactive | [76] | N/A |
| 159 | <chem>[sH+]1c2c(nc1CCC)c(nc1c2cccc1)NC=O</chem>                      | 15d_2013 | Inactive | [76] | N/A |

|     |                                                                  |           |          |      |     |
|-----|------------------------------------------------------------------|-----------|----------|------|-----|
| 160 | <chem>[sH+]1c2c(nc1CCC)c(nc1c2cccc1)NC(=O)CCCCCCC</chem>         | 15g_2013  | Inactive | [76] | N/A |
| 161 | <chem>[sH+]1c2c(nc1CCC)c(nc1c2cccc1)NC(=O)CCCCCCCCCCCCCCC</chem> | 15h_2013  | Inactive | [76] | N/A |
| 162 | <chem>[sH+]1c2c(nc1CCC)c(nc1c2cccc1)NC(=O)CCCCC</chem>           | 15i_2013  | Inactive | [76] | N/A |
| 163 | <chem>[sH+]1c2c(nc1CCC)c(nc1c2cccc1)NC(OCC)=O</chem>             | 15n_2013  | Inactive | [76] | N/A |
| 164 | <chem>[sH+]1c2c(nc1CCC)c(nc1c2cccc1)NC(OCCCC)=O</chem>           | 15o_2013  | Inactive | [76] | N/A |
| 165 | <chem>[sH+]1c2c(nc1CCC)c(nc1c2cccc1)NC(OCCCCCCC)=O</chem>        | 15p_2013  | Inactive | [76] | N/A |
| 166 | <chem>[sH+]1c2c(nc1CCC)c(nc1c2cccc1)NC(=O)N</chem>               | 15q_2013  | Inactive | [76] | N/A |
| 167 | <chem>[sH+]1c2c(nc1CCC)c(nc1c2cccc1)NS(=O)(=O)CC</chem>          | 15s_2013  | Inactive | [76] | N/A |
| 168 | <chem>[sH+]1c2c(nc1CCC)c(nc1c2cccc1)NS(=O)(=O)CCC</chem>         | 15t_2013  | Inactive | [76] | N/A |
| 169 | <chem>[sH+]1c2c(nc1CCC)c(nc1c2cccc1)NS(=O)(=O)CCCC</chem>        | 15u_2013  | Inactive | [76] | N/A |
| 170 | <chem>[sH+]1c2c(nc1CCC)c(nc1c2cccc1)NS(=O)(=O)c1ccc(cc1)C</chem> | 15v_2013  | Inactive | [76] | N/A |
| 171 | <chem>[sH+]1c2c(nc1CCC)c(nc1c2cccc1)NP(OCC)(OCC)=O</chem>        | 15w_2013  | Inactive | [76] | N/A |
| 172 | <chem>[sH+]1c2c(nc1CCC)c(nc1c2cccc1)NC(N)=N</chem>               | 17_2013   | Inactive | [76] | N/A |
| 173 | <chem>[sH+]1c2c(nc1CCCC)c(nc1c2cccc1)NC(=O)C</chem>              | 18b_2013  | Inactive | [76] | N/A |
| 174 | <chem>n1cc(n(CCCCC)c1N)-c1cccc1</chem>                           | 7_2016    | Inactive | [78] | N/A |
| 175 | <chem>O(Cc1cccc1)c1cccc1-c1nc(n(c1)CCCC)N</chem>                 | 18f_2016  | Inactive | [78] | N/A |
| 176 | <chem>Ic1c(nc(nc1NCCC)N)C</chem>                                 | 4a_2016_2 | Inactive | [79] | N/A |
| 177 | <chem>Ic1c(nc(nc1NCCCC)N)C</chem>                                | 4d        | Inactive | [79] | N/A |
| 178 | <chem>Ic1c(nc(nc1N(CCCC)C)N)C</chem>                             | 4e        | Inactive | [79] | N/A |
| 179 | <chem>Ic1c(nc(nc1N(Cc1cccc1)CCCC)N)C</chem>                      | 4f        | Inactive | [79] | N/A |
| 180 | <chem>Ic1c(nc(nc1OCCCC)N)C</chem>                                | 4g        | Inactive | [79] | N/A |
| 181 | <chem>Ic1c(nc(nc1SCCCC)N)C</chem>                                | 4h        | Inactive | [79] | N/A |
| 182 | <chem>n1c(cc(nc1N)C)C#CCCC</chem>                                | 4i        | Inactive | [79] | N/A |
| 183 | <chem>n1c(cc(nc1N)C)CCCC</chem>                                  | 4j        | Inactive | [79] | N/A |
| 184 | <chem>Ic1c(nc(nc1C)N)CCCC</chem>                                 | 4k        | Inactive | [79] | N/A |
| 185 | <chem>Ic1cnc(nc1NCCCC)N</chem>                                   | 17        | Inactive | [79] | N/A |
| 186 | <chem>n1c(NCCCC)cc(nc1N)N</chem>                                 | 18        | Inactive | [79] | N/A |

|     |                                                               |            |          |      |     |
|-----|---------------------------------------------------------------|------------|----------|------|-----|
| 187 | <chem>O(C)c1nc(nc(NCCCC)c1)N</chem>                           | 19         | Inactive | [79] | N/A |
| 188 | <chem>Clc1nc(nc(NCCCC)c1)N</chem>                             | 20         | Inactive | [79] | N/A |
| 189 | <chem>Ic1c(nc(nc1N)N)NCCCC</chem>                             | 21         | Inactive | [79] | N/A |
| 190 | <chem>Ic1c(nc(nc1OC)N)NCCCC</chem>                            | 22         | Inactive | [79] | N/A |
| 191 | <chem>Ic1c(nc(nc1Cl)N)NCCCC</chem>                            | 23         | Inactive | [79] | N/A |
| 192 | <chem>o1c2c(c(Nc3[nH+]ccnc3)c1Nc1ccccc1)c(c[nH+]c2C)CO</chem> | 29         | Inactive | [79] | N/A |
| 193 | <chem>n1c(-c2ccccc2)c(CCCN)c(nc1N)NCCCC</chem>                | 32a        | Inactive | [79] | N/A |
| 194 | <chem>n1c2c(cc(CCCCC)c1N)c(ccc2)Cc1cc(ccc1)C#N</chem>         | 17a_1_2015 | Inactive | [80] | N/A |
| 195 | <chem>n1c2c(cc(CCCCC)c1N)c(ccc2)Cc1ccc(cc1)C#N</chem>         | 17b_2015   | Inactive | [80] | N/A |
| 196 | <chem>n1c2c(cc(CCCCC)c1N)c(ccc2)Cc1ccccc1</chem>              | 17d_2015   | Inactive | [80] | N/A |
| 197 | <chem>O=C(N)c1cc(ccc1)Cc1c2cc(CCCCC)c(nc2ccc1)N</chem>        | 18d_2015   | Inactive | [80] | N/A |
| 198 | <chem>n1c2c(cc(CCCCC)c1N)c(ccc2)-c1cc(ccc1)CN</chem>          | 20a_2015   | Inactive | [80] | N/A |
| 199 | <chem>n1c2c(cc(CCCCC)c1N)cccc2CCCCN</chem>                    | 37_2015    | Inactive | [80] | N/A |
| 200 | <chem>OC1(c2c(N=C1N)cccc2)CCCC</chem>                         | 5_3        | Inactive | [80] | N/A |
| 201 | <chem>n1c2c(n(Cc3ccccc3)c1N)cccc2</chem>                      | 8d_3       | Inactive | [80] | N/A |
| 202 | <chem>n1c2c(n(Cc3cc(N)ccc3)c1N)cccc2</chem>                   | 8f_3       | Inactive | [80] | N/A |
| 203 | <chem>O(CCCC)C(=O)n1c2c(nc1N)cccc2</chem>                     | 9_3        | Inactive | [80] | N/A |
| 204 | <chem>O=C(Nc1nc2c(n1CCCCC)cccc2)C</chem>                      | 10_3       | Inactive | [80] | N/A |
| 205 | <chem>n1c2c(n(CCCCC)c1N)cc1c(c2)cccc1</chem>                  | 13_3       | Inactive | [80] | N/A |
| 206 | <chem>n1c2c(n(CCCCC)c1N)c1c(cc2)cccc1</chem>                  | 18_3       | Inactive | [80] | N/A |
| 207 | <chem>n1c2ncccc2n(CCCCC)c1N</chem>                            | 27a_3      | Inactive | [80] | N/A |
| 208 | <chem>n1c2c(n(CCCCC)c1N)ccnc2</chem>                          | 27b_3      | Inactive | [80] | N/A |
| 209 | <chem>n1c2c(n(CCCCC)c1N)cncc2</chem>                          | 27c_3      | Inactive | [80] | N/A |
| 210 | <chem>n1c2cccnc2n(CCCCC)c1N</chem>                            | 27d_3      | Inactive | [80] | N/A |
| 211 | <chem>Fc1c2nc(n(c2ccc1)CCCCC)N</chem>                         | 31f_3      | Inactive | [80] | N/A |
| 212 | <chem>Clc1c2nc(n(c2ccc1)CCCCC)N</chem>                        | 31g_3      | Inactive | [80] | N/A |
| 213 | <chem>FC(F)(F)c1c2nc(n(c2ccc1)CCCCC)N</chem>                  | 31h_3      | Inactive | [80] | N/A |

|     |                                                                     |         |          |      |     |
|-----|---------------------------------------------------------------------|---------|----------|------|-----|
| 214 | <chem>Brc1c2nc(n(c2ccc1)CCCCC)N</chem>                              | 31i_3   | Inactive | [80] | N/A |
| 215 | <chem>n1c2c(n(CCCCC)c1N)cccc2-c1ccccc1</chem>                       | 31l_3   | Inactive | [80] | N/A |
| 216 | <chem>n1c2c(n(CCCCC)c1N)cccc2Cc1ccccc1</chem>                       | 31m_3   | Inactive | [80] | N/A |
| 217 | <chem>O(Cc1ccccc1)c1c2nc(n(c2ccc1)CCCCC)N</chem>                    | 35_3    | Inactive | [80] | N/A |
| 218 | <chem>O=[N+](([O-])c1c2nc(n(c2ccc1)CCCCC)N</chem>                   | 39_3    | Inactive | [80] | N/A |
| 219 | <chem>n1c2c(cc(CCCCC)c1N)cccc2</chem>                               | 14c_4   | Inactive | [82] | N/A |
| 220 | <chem>n1c2c(cc(CCCCC)c1N)cccc2</chem>                               | 21a_4   | Inactive | [82] | N/A |
| 221 | <chem>n1c2c(cccc2)c(CC)c(CCCCC)c1N</chem>                           | 21b_4   | Inactive | [82] | N/A |
| 222 | <chem>n1c2c(cccc2)c(CCC(C)C)c(CCCCC)c1N</chem>                      | 21c_4   | Inactive | [82] | N/A |
| 223 | <chem>O(CCCC)c1cc(nc2c1cccc2)N</chem>                               | 24a_4   | Inactive | [82] | N/A |
| 224 | <chem>O(CCCCC)c1cc(nc2c1cccc2)N</chem>                              | 24b_4   | Inactive | [82] | N/A |
| 225 | <chem>n1c2c(cccc2)c(cc1N)CCCC</chem>                                | 27a_4_4 | Inactive | [82] | N/A |
| 226 | <chem>n1c2c(cccc2)c(cc1N)CCCC</chem>                                | 27a_4   | Inactive | [82] | N/A |
| 227 | <chem>[n+]12c([nH]c(-c3ccccc3)c1NC1CCCC1)c(ncc2)N</chem>            | 5a_5    | Inactive | [58] | N/A |
| 228 | <chem>[n+]12c([nH]c(-c3ccc(cc3)-c3ccccc3)c1NC1CCCC1)c(ncc2)N</chem> | 5b_5    | Inactive | [58] | N/A |
| 229 | <chem>[n+]12c([nH]c(CCCC)c1Nc1ccccc1)c(ncc2)N</chem>                | 5c_5    | Inactive | [58] | N/A |
| 230 | <chem>O(C)c1ccc(Nc2[n+]3c([nH]c2CCCC)c(ncc3)N)cc1</chem>            | 5d_5    | Inactive | [58] | N/A |
| 231 | <chem>[n+]12c([nH]c(-c3ccccc3)c1NC(C)(C)C)c(ncc2)N</chem>           | 6       | Inactive | [58] | N/A |
| 232 | <chem>Oc1ccccc1-c1[nH]c2[n+](ccnc2N)c1Nc1ccccc1</chem>              | 23_5    | Inactive | [58] | N/A |
| 233 | <chem>OCCc1c2c(nc1C[NH2+]CC)c1c(nc2)cccc1</chem>                    | 6a_2011 | Inactive | [56] | N/A |
| 234 | <chem>O(C)c1ccc(cc1)Cn1c2c(nc1-c1ccccc1)c1c(nc2)cccc1</chem>        | 5b_2011 | Inactive | [56] | N/A |

---

**Table S2. List of 13 small molecular weight compounds selected for experimental validation.**

| #  | Name  | Compound ID         | IUPAC name                                                                                                                                               | Molecular weight (g/mol) |
|----|-------|---------------------|----------------------------------------------------------------------------------------------------------------------------------------------------------|--------------------------|
| 1  | TAC1  | ZINC2901940         | (1-heptylbenzimidazol-3-ium-2-yl)amine                                                                                                                   | 231                      |
| 2  | TAC2  | ZINC95362363        | 5-ethyl-N4-[3-[(5-methyl-2-pyridyl)amino]propyl]pyrimidine-2,4-diamine                                                                                   | 286                      |
| 3  | TAC3  | ZINC04679422        | 1-butyl-5-(4-ethoxyphenyl)-imidazol-2-amine                                                                                                              | 259                      |
| 4  | TAC4  | MolPort-019-730-277 | N-(1,2,3,4-tetrahydroquinolin-2-ylidene)butan-1-amine                                                                                                    | 202                      |
| 5  | TAC5  | MolPort-000-141-803 | 3-(benzyloxy)pyridin-2-amine                                                                                                                             | 200                      |
| 6  | TAC6  | MolPort-001-844-727 | N2-benzyl-N4-butyl-6-methylpyrimidine-2,4-diamine                                                                                                        | 270                      |
| 7  | TAC7  | MolPort-002-892-663 | 3-[(3-methylphenyl)methoxy]pyridin-2-amine                                                                                                               | 214                      |
| 8  | TAC8  | MolPort-000-164-223 | 1-[2-(diethylamino)ethyl]-1H-1,3-benzodiazol-2-amine                                                                                                     | 232                      |
| 9  | TAC9  | ZINC4070639         | 1-naphthaleneacetamide, N-(2-methyl-4-nitrophenyl)                                                                                                       | 320                      |
| 10 | TAC10 | ZINC1388538         | 5,6-dimethyl-1-propyl-1H-1,3-benzimidazol-4-ylamine                                                                                                      | 203                      |
| 11 | TAC11 | ZINC91914538        | 5-ethyl-N4-[3-(3-pyridyl)propyl]pyrimidine-2,4-diamine                                                                                                   | 257                      |
| 12 | TAC12 | MolPort-001-886-853 | 12,14-dimethyl-17-thia-9,15-diazatetracyclo[8.7.0.0 <sup>2</sup> ,7.0 <sup>11</sup> ,1 <sup>6</sup> ]heptadeca-1(10),2,4,6,8,11(16),12,14-octaen-8-amine | 279                      |
| 13 | TAC13 | MolPort-005-925-640 | 4-[2-(dimethylamino)ethyl]-5,6-dimethyl-2,4-diazatricyclo[7.5.0.0 <sup>3</sup> ,7]tetradeca-1(9),2,5,7-tetraen-8-amine                                   | 300                      |

## Supplementary Methods

### Chemical synthesis and characterization of TAC5 derivatives

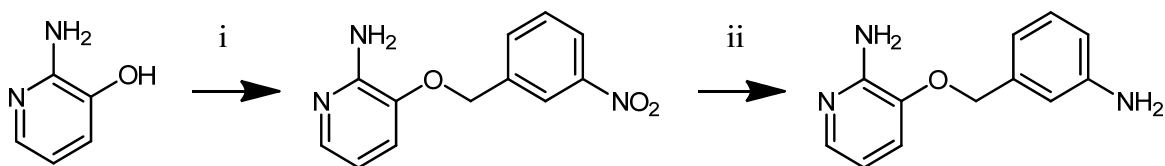

Synthesis of 3-((4-aminobenzyl)oxy)pyridin-2-amine (TAC5-a)

Reagents and conditions: (i) 3-nitrobenzylbromide,  $\text{Cs}_2\text{CO}_3$ , DMF, RT; (ii)  $\text{SnCl}_2$ , EtOH, reflux.

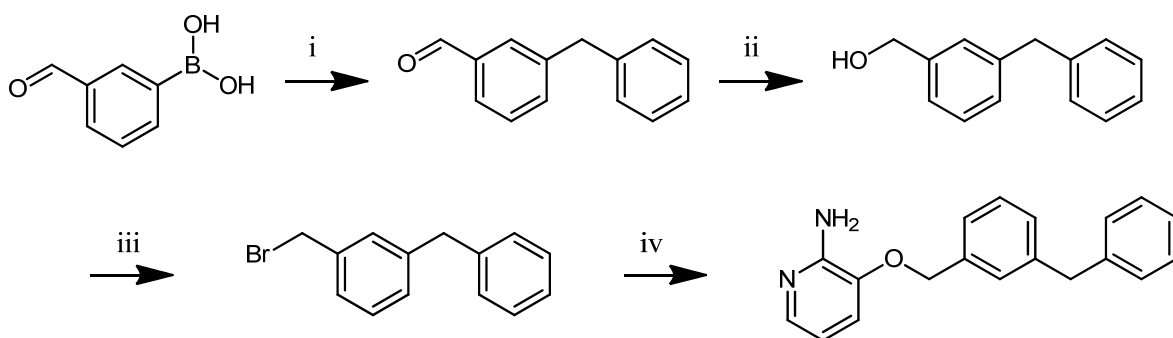

Synthesis of 3-((3-benzylbenzyl)oxy)pyridin-2-amine (TAC5-b)

Reagents and conditions: (i) benzylbromide,  $\text{Pd}(\text{PPh}_3)_4$ ,  $\text{Na}_2\text{CO}_3$ , toluene, 80 °C; (ii)  $\text{NaBH}_4$ , Me OH, 0 °C; (iii) HBr, water: $\text{CH}_2\text{Cl}_2$  (v:v = 1:1), RT; (iv) 2-amino-3-hydroxypyridine,  $\text{Cs}_2\text{CO}_3$ , DM F, RT.

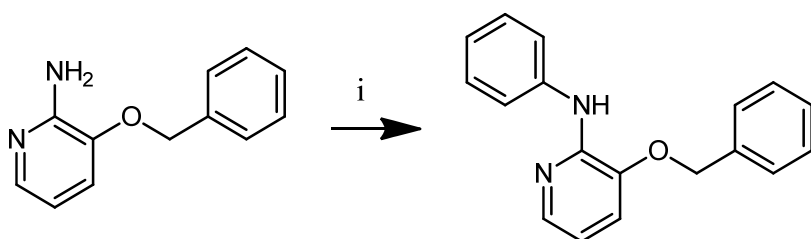

Synthesis 3-(benzyloxy)-N-phenylpyridin-2-amine (TAC5-c)

Reagents and conditions: (i) bromobenzene, CuI, DMEDA,  $\text{K}_2\text{CO}_3$ , 1,4-dioxane, 90 °C.



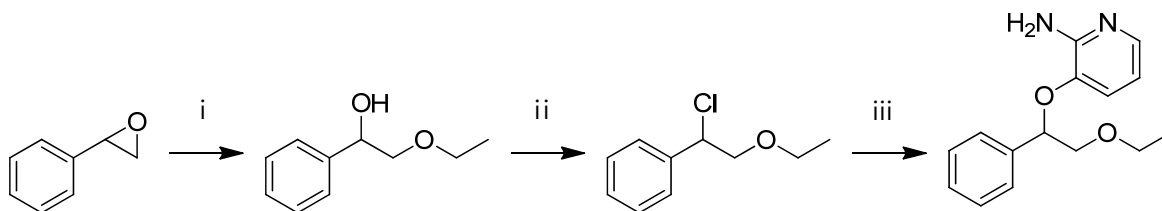

Synthesis of 3-(2-ethoxy-1-phenylethoxy)pyridine-2-amine (TAC5-d).

Reagent condition: (i) EtOH, NaOH, reflux; (ii) thionyl chloride, DCM, 0 °C to RT; (iii) Cs<sub>2</sub>CO<sub>3</sub>, 2-amino-3-hydroxypyridine, DMF, RT.

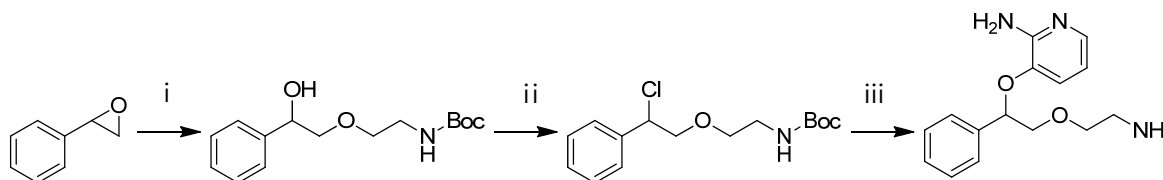

Synthesis of 3-(2-(2-aminoethoxy)-1-phenylethoxy)pyridine-2-amine (TAC5-e).

Reagents and conditions: (i) N-Boc-ethanolamine, NaH, THF, 60 °C; (ii) thionyl chloride, DCM, 0 °C; (iii) 1. Cs<sub>2</sub>CO<sub>3</sub>, 3-hydroxyl-2-aminopyridine, DMF, RT; 2. TFA, DCM (v:v = 1:2), RT, 4 h.

### General chemistry methods

All reactions were carried out under an atmosphere of nitrogen or argon in air-dried glassware with magnetic stirring. Air- and/or moisture-sensitive liquids were transferred with a syringe. Organic solutions were concentrated by rotary evaporation at 25–60 °C at 15–30 torr. All solvents and common materials were purchased from suppliers and used without further purification. Column chromatography was carried out as “Flash Chromatography” using a Biotage MPLC machine. <sup>1</sup>H NMR and <sup>13</sup>C NMR data were recorded on a JEOL ECZ-600R Magnetic Resonance System (600 MHz) at Ajou University. Recorded chemical shifts were reported in parts per million (δ). Multiplicity was indicated as follows: s (singlet); d (doublet); t (triplet); q (quartet); m (multiplet); br (broad) etc. Coupling constants (J) were reported in Hz. Low-resolution mass spectrometry (LRMS) was obtained by an LC/MS system, Finnigan MSQplus Surveyor (Thermo Fisher Scientific, Inc, Waltham, MA, USA) or 6120 Quadrupole LC/MS (Agilent Technologies, Santa

Clara, CA, USA). All chemicals were purchased from Sigma-Aldrich, Co. (St. Louis, MO, USA), Tokyo Chemical Industry Co., Ltd (Tokyo, Japan) or ThermoFisher Scientific, Inc. and used without further purification unless otherwise specified. The reaction progress was monitored using thin-layer chromatography (TLC) (silica gel 60, F254 0.25 mm), and components were visualized by observation under UV light (254 and 365 nm) or by treating the TLC plates with phosphomolybdic acid (PMA),  $\text{KMnO}_4$ , or ninhydrin followed by heating.

## Synthesis

### Synthesis of 3-((3-nitrobenzyl)oxy)pyridin-2-amine (TAC5-a intermediate)

3-Nitrobenzyl bromide (4.0 g, 18.52 mmol) in DMF (20 ml) was added to a solution of 2-amino-3-hydroxyl pyridine (2.04 g, 18.52 mmol) and  $\text{Cs}_2\text{CO}_3$  (6.03 g, 18.52 mmol) in DMF (80 ml), stirred in an argon atmosphere and the resulting reaction mixture was stirred at room temperature for 3 h. After reaction completion, the reaction mixture was added to a saturated  $\text{NaHCO}_3$  (aq.) solution and extracted with  $\text{CH}_2\text{Cl}_2$  three times. The combined organic layer was dried with  $\text{Na}_2\text{SO}_4$  (s) and concentrated *in vacuo*. The crude product was purified with silica-gel column chromatography to yield a product (2.20 g, yield = 48.4%) as a yellow solid.  $^1\text{H}$  NMR (600 MHz,  $\text{CDCl}_3$ )  $\delta$  8.29 (s, 1H), 8.21 (dd,  $J$  = 8.1 Hz, 1H), 7.76 (d,  $J$  = 7.7 Hz, 1H), 7.70 (d,  $J$  = 4.8 Hz, 1H), 7.59 (t,  $J$  = 7.9 Hz, 1H), 6.95 (dd,  $J$  = 7.8 Hz, 1H), 6.60 (dd,  $J$  = 7.8 Hz, 1H), 5.12 (s, 2H), 4.75 (bs, 2H);  $^{13}\text{C}$  NMR (150 MHz,  $\text{CDCl}_3$ )  $\delta$  150.2, 148.5, 141.0, 139.9, 138.5, 133.4, 129.9, 123.4, 122.4, 117.0, 113.7, 69.0.

### Synthesis of 3-((3-aminobenzyl)oxy)pyridin-2-amine (TAC5-a)

A mixture of Tin (II) chloride (7.732 g), 1 N HCl (aq, 0.2 ml), distilled water (40 ml), and 3-((3-nitrobenzyl)oxy)pyridin-2-amine (2.0 g) was refluxed for 3 h. After reaction completion, the reaction mixture was cooled to room temperature. The resulting precipitated solid was collected by filtration, dissolved with saturated  $\text{NaHCO}_3$  (aq.) solution and extracted with EA) three times. The combined organic layer was dried with  $\text{Na}_2\text{SO}_4$  (s) and concentrated *in vacuo* to yield a product (945 mg, yield = 53.9%) as a white solid without further purification.  $^1\text{H}$  NMR (600 MHz,  $\text{CDCl}_3$ )  $\delta$  7.67 (d,  $J$  = 4.2 Hz, 1H), 7.17 (t,  $J$  = 7.8 Hz, 2H), 6.94 (d,  $J$  = 8.4 Hz, 1H), 6.73 (s, 1H), 6.66 (dd,  $J$  = 8.1 Hz, 1H), 6.58 (dd,  $J$  = 7.8 Hz, 1H), 4.98 (s, 2H), 4.70 (bs, 2H), 3.72 (bs, 2H);  $^{13}\text{C}$  NMR (150 MHz,  $\text{CDCl}_3$ )  $\delta$  150.3, 146.8, 141.6, 139.1, 137.6, 129.7, 117.6, 116.9, 115.0, 113.9, 113.8, 70.3. LRMS (ESI)  $m/z$  calculated for  $\text{C}_{12}\text{H}_{14}\text{N}_3\text{O}$   $[\text{M}+\text{H}]^+$ : 216.11; found: 216.00.

### Synthesis of 3-benzylbenzaldehyde (TAC5-b intermediate 1)

3-Formyl phenylboronic acid (450 mg, 3.0 mmol) and tetrakis(triphenylphosphine)palladium(0) (139 mg, 0.12 mmol) were added and purged with Ar. Toluene (15 ml), benzyl bromide, and 2 N Na<sub>2</sub>CO<sub>3</sub> (3 ml) were added and the resulting reaction mixture was stirred at 80 °C for 4 h. After reaction completion, the reaction mixture was diluted with NaHCO<sub>3</sub> and extracted with CH<sub>2</sub>Cl<sub>2</sub> three times. The combined organic layer was concentrated *in vacuo*. The crude product was purified by silica-gel column chromatography (EA:Hex = Hex 100%-EA 15%) to yield a product (503 mg, yield = 85.3%) as a clear oil. <sup>1</sup>H NMR (600 MHz, CDCl<sub>3</sub>) δ 9.86 (s, 1H), 7.63 (m, 2H), 7.23 (m, 7H), 3.95 (s, 2H); <sup>13</sup>C NMR (150 MHz, CDCl<sub>3</sub>) δ 191.9, 141.9, 139.8, 136.4, 134.7, 129.5, 128.8, 128.6, 128.4, 127.4, 126.1, 41.2.

### Synthesis of (3-Benzylphenyl)methanol (TAC5-b intermediate 2)

NaBH<sub>4</sub> (75 mg, 2 mmol) was added dropwise to a solution of 3-benzylbenzaldehyde (196 mg, 1.0 mmol) in methanol (10 ml) that was stirred at 0 °C. The resulting reaction mixture was allowed to stir at 0 °C for 1 h. After reaction completion, the reaction mixture was washed with distilled water and extracted with CH<sub>2</sub>Cl<sub>2</sub> three times. The combined organic layer was concentrated *in vacuo*. The crude product was purified with silica-gel column chromatography (EA:Hex = Hex 100%-EA 50%) to yield a product (203 mg, quantitative yield) as a clear oil. <sup>1</sup>H NMR (600 MHz, CDCl<sub>3</sub>) δ 7.13 (m, 9H), 4.41 (s, 2H), 3.89 (s, 2H), 2.89 (s, 1H); <sup>13</sup>C NMR (150 MHz, CDCl<sub>3</sub>) δ 141.2, 140.9, 140.9, 128.7, 128.4, 128.3, 127.9, 127.3, 125.9, 124.6, 64.7, 41.7.

### Synthesis of 1-benzyl-3-(bromomethyl)benzene (TAC5-b intermediate)

(3-Benzylphenyl)methanol (198 mg, 1.0 mmol) was diluted with a 1:1 (v/v) mixture of DCM and HBr mixture (5 ml), and the resulting reaction mixture was stirred at room temperature for 36 h. After reaction completion, the reaction mixture was diluted with NaHCO<sub>3</sub> and extracted with CH<sub>2</sub>Cl<sub>2</sub> three times. The combined organic layer was concentrated *in vacuo*. The crude product was purified using silica-gel column chromatography (EA:Hex = Hex 100%-EA 10%) to yield a product (185 mg, yield = 70.8%) as a clear oil. <sup>1</sup>H NMR (600 MHz, CDCl<sub>3</sub>) δ 7.17 (m, 9H), 4.36 (s, 2H), 3.92 (s, 2H); <sup>13</sup>C NMR (150 MHz, CDCl<sub>3</sub>) δ 141.6, 140.5, 137.8, 129.4, 129.0, 128.9, 128.8, 128.5, 126.8, 126.1, 41.6, 33.5.

### Synthesis of 3-((3-benzylbenzyl)oxy)pyridin-2-amine (TAC5-b)

1-Benzyl-3-(bromomethyl)benzene (178 mg, 0.68 mmol) in DMF (3.8 ml) was added to a solution of 2-amino-3-hydroxy pyridine (75 mg, 0.68 mmol) and Cs<sub>2</sub>CO<sub>3</sub> (222 mg, 0.68 mmol) in DMF (3 ml). The resulting reaction mixture was stirred at room temperature for 2 h. After reaction completion, the reaction mixture was diluted with NaHCO<sub>3</sub> and extracted with CH<sub>2</sub>Cl<sub>2</sub> three times. The combined organic layer was concentrated *in vacuo*. The crude product was purified using silica-gel column chromatography (EA:Hex = Hex 100%-EA 100%) to yield a product (110 mg, yield = 55.9%) as a yellow solid. <sup>1</sup>H NMR (600 MHz, CDCl<sub>3</sub>) δ 7.65 (d, *J* = 6.0 Hz, 1H), 7.21 (s, 9H), 6.88 (d, *J* = 6.6 Hz, 1H), 6.53 (dd, *J* = 7.8 Hz, 1H), 4.94 (s, 2H), 4.79 (bs, 2H), 3.96 (s, 2H); <sup>13</sup>C NMR (150 MHz, CDCl<sub>3</sub>) δ 150.3, 141.5, 141.3, 140.6, 138.9, 136.5, 128.8, 128.7, 128.6, 128.4, 128.0, 126.1, 125.2, 116.7, 113.3, 70.0, 41.6; LRMS (ESI) *m/z* calculated for C<sub>19</sub>H<sub>19</sub>N<sub>2</sub>O [M+H]<sup>+</sup>: 291.14; found: 291.20.

### Synthesis of 3-(benzyloxy)-N-phenylpyridin-2-amine (TAC5-c)

A solution of bromobenzene (786 μl, 7.5 mmol) was added slowly to a solution of 2-amino-3-benzyloxy pyridine (1.0 g, 5.0 mmol), copper (I) iodide (0.48 g, 2.5 mmol), potassium carbonate (1.38 g, 10.0 mmol), and *N,N'*-dimethylethylenediamine (270 μl, 2.5 mmol) in 1,4-dioxane (25 ml). The resulting reaction mixture was stirred at 90 °C for 17 h. After reaction completion, the reaction mixture was diluted with saturated NaHCO<sub>3</sub> (aq.) and extracted with CH<sub>2</sub>Cl<sub>2</sub> three times. The combined organic layer was concentrated *in vacuo*. The crude product was purified with silica-gel column chromatography (EA:Hex = Hex 100%-EA 20%) to yield a product (0.11 g, yield = 15.8% (isolation yield)) as a white solid. <sup>1</sup>H NMR (600 MHz, CDCl<sub>3</sub>) δ 7.86 (dd, *J* = 4.8 Hz, 1H), 7.70 (d, *J* = 7.8 Hz, 2H), 7.46-7.39 (m, 5H), 7.23 (t, *J* = 7.8 Hz, 2H), 7.07 (bs, 1H), 7.04 (dd, *J* = 7.8 Hz, 1H), 6.69 (dd, *J* = 7.4 Hz, 1H), 5.14 (s, 2H); <sup>13</sup>C NMR (150 MHz, CDCl<sub>3</sub>) δ 147.0, 141.7, 141.0, 138.9, 136.4, 129.2, 129.1, 128.7, 128.0, 121.9, 119.2, 116.6, 114.4, 70.7. LRMS (ESI) *m/z* calculated for C<sub>18</sub>H<sub>17</sub>N<sub>2</sub>O [M+H]<sup>+</sup>: 277.13; found: 277.15.

### Synthesis of 2-ethoxy-1-phenylethanol. (TAC5-d intermediate 1)

To a solution of NaOH (440 mg, 11 mmol) in EtOH (50 ml), stirred under Ar atmosphere, was added styrene oxide (1.13 ml, 10 mmol) and resulting reaction mixture was refluxed for 3 h. Reaction mixture was cooled down to RT, diluted with sat. NaHCO<sub>3</sub> (aq.) and extracted with DCM for three times. Combined DCM layer was dried over Na<sub>2</sub>SO<sub>4</sub> (s) and concentrated *in vacuo*. Flash silica gel column chromatography afforded the desired product (800 mg, 48.1 %) as a clear oil. <sup>1</sup>H

NMR (600 MHz, CDCl<sub>3</sub>) δ 7.36 (m, 5H), 4.88 (dd, J = 9.6 Hz, 1H), 3.57 (m, 3H), 3.43 (t, J = 9.0 Hz, 1H), 3.14 (s, 1H), 1.23 (t, J = 6.6 Hz, 3H); <sup>13</sup>C NMR (150 MHz, CDCl<sub>3</sub>) δ 140.3, 128.2, 127.7, 126.1, 76.1, 72.7, 66.6, 15.0.

#### **Synthesis of (1-chloro-2-ethoxyethyl)benzene. (TAC5-d intermediate 2)**

To a solution of compound 4-a (1.0 g, 6.02 mmol) in DCM (15 ml), stirred at 0 °C, added a solution of thionyl chloride (524 μl, 7.22 mmol) in DCM (10 ml) and the resulting reaction mixture was stirred at 0 °C. After stirring at 0 °C for an additional 1 h, the reaction mixture was gradually warmed up to RT. After reaction completion, the reaction mixture was diluted with NaHCO<sub>3</sub> (aq.) and extracted with DCM three times. The combined DCM layer was dried over Na<sub>2</sub>SO<sub>4</sub> (s) and concentrated *in vacuo*. Flash silica gel column chromatography afforded the desired product (452 mg, 40.7 %) as a clear oil. <sup>1</sup>H NMR (600 MHz, CDCl<sub>3</sub>) δ 7.36 (m, 5H), 4.99 (dd, J = 7.2 Hz, 1H), 3.81 (m, 2H), 3.55 (m, 2H), 1.97 (t, J = 7.2 Hz, 3H); <sup>13</sup>C NMR (150 MHz, CDCl<sub>3</sub>) δ 138.7, 128.4, 128.3, 127.2, 75.1, 66.5, 61.0, 14.8.

#### **Synthesis of 3-(2-ethoxy-1-phenylethoxy)pyridine-2-amine (TAC5-d)**

To a solution of 2-amino-3-hydroxypyridine (120 mg, 1.08 mmol) and KOH (68 mg, 1.08 mmol) in DMF (5 ml) was added compound 4-b (200 mg, 1.08 mmol) and resulting reaction mixture was stirred at 60 °C for 4 h. After reaction completion, reaction mixture was diluted with NaHCO<sub>3</sub> (aq.) and extracted with DCM for three times. Combined DCM layer was dried over Na<sub>2</sub>SO<sub>4</sub> (s) and concentrated *in vacuo*. Flash silica gel column chromatography afforded the desired product (137 mg, 49.1 %) as a white solid. <sup>1</sup>H NMR (600 MHz, CDCl<sub>3</sub>) δ 7.65 (dd, J = 6.0 Hz, 1H), 7.36 (m, 5H), 6.71 (d, J = 8.4 Hz, 1H), 6.39 (dd, J = 7.8 Hz, 1H), 5.12 (dd, J = 9.0 Hz, 1H), 5.02 (bs, 2H), 3.84 (m, 1H), 3.61 (m, 3H), 1.24 (t, J = 7.2 Hz, 3H); <sup>13</sup>C NMR (150 MHz, CDCl<sub>3</sub>) δ 151.7, 140.4, 140.3, 137.9, 128.5, 128.1, 126.3, 121.7, 112.9, 81.5, 74.7, 66.7, 14.9; LRMS (ESI) m/z calcd. for C<sub>15</sub>H<sub>19</sub>N<sub>2</sub>O<sub>2</sub> [M+H]<sup>+</sup> 258.14; found : 259.05.

#### **Synthesis of tert-butyl (2-(2-hydroxy-2-phenylethoxy)ethyl)carbamate (TAC5-e intermediate 1)**

To a solution of NaH (60 % dispersion in mineral oil, 40 mg, 1.0 mmol) in *N*-Boc-ethanolamine : THF (1.0 ml, v:v = 1:1) was stirred at 60 °C, added styrene oxide (114 μl, 1.0 mmol) and resulting reaction mixture was stirred at 60 °C for overnight. After reaction completion, reaction mixture

was diluted with NaHCO<sub>3</sub> (aq.) and extracted with DCM for three times. Combined DCM layer was dried over Na<sub>2</sub>SO<sub>4</sub> (s) and concentrated *in vacuo*. Flash silica gel column chromatography afforded the desired product (70 mg, 24.9 %) as a clear oil.; <sup>1</sup>H NMR (600 MHz, CDCl<sub>3</sub>) δ 7.36 (m, 5H), 5.04 (bs, 1H), 4.87 (dd, J = 8.4 Hz, 1H), 3.58 (m, 4H), 3.32 (bs, 2H), 3.22 (s, 1H), 1.43 (s, 9H); <sup>13</sup>C NMR (150 MHz, CDCl<sub>3</sub>) δ 140.3, 128.3, 127.8, 126.1, 76.5, 72.7, 70.4, 40.3, 28.4.

### **Synthesis of tert-butyl (2-(2-chloro-2-phenylethoxy)ethyl)carbamate (TAC5-e intermediate 2)**

To a solution of compound 5-a (128 mg, 0.46 mmol) in DCM (4.5 ml), stirred at 0 °C, added thionyl chloride (40 μl, 0.55 mmol) and resulting reaction mixture was stirred at 0 °C for 1.5 h. After reaction completion, reaction mixture was diluted with NaHCO<sub>3</sub> (aq.) and extracted with DCM for three times. Combined DCM layer was dried over Na<sub>2</sub>SO<sub>4</sub> (s) and concentrated *in vacuo*. Flash silica gel column chromatography afforded the desired product (69 mg, 50.6 %) as a clear oil.; <sup>1</sup>H NMR (600 MHz, CDCl<sub>3</sub>) δ 7.36 (m, 5H), 4.97 (t, J = 6.0 Hz, 1H), 4.79 (s, 1H), 3.86 (m, 2H), 3.55 (m, 2H), 3.27 (s, 2H), 1.44 (s, 9H); <sup>13</sup>C NMR (150 MHz, CDCl<sub>3</sub>) δ 138.5, 128.7, 128.6, 127.4, 75.5, 70.3, 60.8, 40.2, 28.4.

### **Synthesis of 3-(2-(2-aminoethoxy)-1-phenylethoxy)pyridin-2-amine (TAC5-e)**

A solution of compound 5-b (69 mg, 0.24 mmol), Cs<sub>2</sub>CO<sub>3</sub> (79 mg, 0.24 mmol), and 2-amino-3-hydroxyl pyridine (27 mg, 0.24 mmol) in DMF (3 ml) was stirred at RT to 40 °C for overnight. After reaction completion, reaction mixture was diluted with NaHCO<sub>3</sub> (aq.) and extracted with DCM for three times. Combined DCM layer was dried over Na<sub>2</sub>SO<sub>4</sub> (s) and concentrated *in vacuo*. Flash silica gel column chromatography afforded the desired product. Purified product was used for next reaction without further characterization. Purified compound was stirred in DCM:TFA (v:v = 2:1) at RT for 4 h. After reaction completion, reaction mixture was diluted with NaHCO<sub>3</sub> (aq.) and extracted with DCM for three times. Combined DCM layer was dried over Na<sub>2</sub>SO<sub>4</sub> (s). Concentration of resulting filtrate afforded the desired product (10 mg, 15.2 %) as a yellow solid.; <sup>1</sup>H NMR (600 MHz, CD<sub>3</sub>OD) δ 7.43 (m, 6H), 8.86 (d, J = 7.8 Hz, 1H), 6.42 (dd, J = 7.8 Hz, 1H), 5.39 (dd, J = 7.2 Hz, 1H), 3.93 (dd, J = 10.8 Hz, 1H), 3.75 (dd, J = 6.6 Hz, 1H), 3.61 (t, J = 5.4 Hz, 2H), 3.35 (s, 1H), 2.81 (bs, 2H); <sup>13</sup>C NMR (150 MHz, CD<sub>3</sub>OD) δ 152.9, 142.1, 139.4, 139.2, 129.7, 129.4, 127.7, 121.3, 113.9, 81.5, 76.2, 73.4, 41.9.; LRMS (ESI) m/z calcd. for C<sub>15</sub>H<sub>20</sub>N<sub>3</sub>O<sub>2</sub> [M+H]<sup>+</sup> 274.15; found : 274.10.
